# Supplementary material for: Effects of pH and Temperature on Water under Pressurized Conditions in the Extraction of Nutraceuticals from Chaga (Inonotus obliquus) Mushroom
Source: MDPI journal article supplement (doi:10.3390/antiox10081322), 2021-08-23
Supplement: s1 [file s1]

## RESULTS

**Table S1**

Hydrophilic (HAA), Lipophilic (LAA) and total antioxidant (TAA) activities in Chaga (*Inonotus obliquus*) at Various pH values and Temperature treatments

| pH and temperature treatment | Antioxidant activities' values (μM TE/g Chaga DW) |                           |                            |
|------------------------------|---------------------------------------------------|---------------------------|----------------------------|
|                              | HAA                                               | LAA                       | TAA                        |
| pH 2.5 at 60°                | 106.35± 2.98 <sup>c</sup>                         | 11.36±1.02 <sup>c</sup>   | 117.72± 3.13 <sup>c</sup>  |
| pH 2.5 at 100°               | 149.59±2.63 <sup>c</sup>                          | 14.59±0.31 <sup>b</sup>   | 164.18±2.85 <sup>c</sup>   |
| pH 7 at 60°                  | 92.40±1.35 <sup>f</sup>                           | 9.86±0.06 <sup>d</sup>    | 102.27±1.39 <sup>f</sup>   |
| pH 7 at 100 °                | 143.36±1.91 <sup>c</sup>                          | 14.09± 0.34 <sup>b</sup>  | 157.46± 1.97 <sup>c</sup>  |
| pH 9.5 at 60°                | 119.87± 1.55 <sup>d</sup>                         | 14.65 ± 0.23 <sup>b</sup> | 134.52± 1.74 <sup>d</sup>  |
| pH 9.5 at 100°               | 192.10± 3.30 <sup>b</sup>                         | 12.49± 0.14 <sup>c</sup>  | 204.59 ± 3.24 <sup>b</sup> |
| pH 11.5 at 100°              | 342.85±3.62 <sup>a</sup>                          | 28.01±0.37 <sup>a</sup>   | 370.86±3.81 <sup>a</sup>   |

Note: Values (μmol Trolox equivalent/DW g of Chaga extract) represents means ± standard errors. Means that are within the same column and contain different letters indicate a significant difference between the treatments, LSD=0.05, n=4 per each replicate of the sample. HAA= hydrophilic antioxidant activity, LAA= lipophilic antioxidant activity, TAA= total antioxidant activity. Each sample is at a different pH (2.5, 7, 9.5, and 11.5) and temperature (60 °and 100 °).

**Table S2**

Hydrophilic (HPC), Lipophilic (LPC) and total phenolic content (TPC) in Chaga (*Inonotus obliquus*) at various pH values and Temperature treatments

| pH and temperature treatment | Phenolic Content ( $\mu\text{M}$ QE/per g Chaga) |                                |                                |
|------------------------------|--------------------------------------------------|--------------------------------|--------------------------------|
|                              | HPC                                              | LPC                            | TPC                            |
| pH 2.5 at 60 °               | 73.83 $\pm$ 3.30 <sup>bc</sup>                   | 57.13 $\pm$ 1.97 <sup>a</sup>  | 130.95 $\pm$ 4.18 <sup>b</sup> |
| pH 2.5 at 100°               | 67.04 $\pm$ 4.57 <sup>c</sup>                    | 53.71 $\pm$ 0.54 <sup>ab</sup> | 120.75 $\pm$ 4.24 <sup>b</sup> |
| pH 7 at 60°                  | 56.00 $\pm$ 5.12 <sup>d</sup>                    | 52.75 $\pm$ 0.90 <sup>b</sup>  | 108.32 $\pm$ 4.83 <sup>c</sup> |
| pH 7 at 100°                 | 69.79 $\pm$ 2.62 <sup>bc</sup>                   | 52.83 $\pm$ 1.62 <sup>b</sup>  | 122.62 $\pm$ 2.14 <sup>b</sup> |
| pH 9.5 at 60 °               | 79.50 $\pm$ 2.11 <sup>b</sup>                    | 48.05 $\pm$ 0.31 <sup>c</sup>  | 127.56 $\pm$ 2.32 <sup>b</sup> |
| pH 9.5 at 100 °              | 55.22 $\pm$ 3.69 <sup>d</sup>                    | 48.21 $\pm$ 1.95 <sup>c</sup>  | 103.43 $\pm$ 4.48 <sup>c</sup> |
| pH 11.5 at 100°              | 224.38 $\pm$ 2.60 <sup>a</sup>                   | 48.67 $\pm$ 0.68 <sup>c</sup>  | 273.06 $\pm$ 2.19 <sup>a</sup> |

*Note:* Values ( $\mu\text{mol}$  Quercetin equivalent/ DW g of Chaga extract) represents means  $\pm$  standard errors. Means that are within the same column and contain different letters indicate a significant difference between the treatments, LSD=0.05, n=4 per each replicate of the sample. HPC= hydrophilic phenolic content, LPC= lipophilic phenolic content, TPC= total phenolic content. Each sample is at a different pH (2.5, 7, 9.5, 11.5) and temperature (60°C and 100°C).

Table S3.A. p-values (Pearson)

| Variables | DHTA    | DHBA    | SalA    | ToHBen  | DHBA2   | MEA     | ToPA's  | CA      | MCA     | ToCA    | HAA     | LAA     | TAA     | HPC     | LPC   | TPC     |
|-----------|---------|---------|---------|---------|---------|---------|---------|---------|---------|---------|---------|---------|---------|---------|-------|---------|
| DHTA      | 0       | <0.0001 | 0.095   | <0.0001 | <0.0001 | <0.0001 | <0.0001 | <0.0001 | <0.0001 | <0.0001 | 0.004   | 0.057   | 0.004   | 0.182   | 0.048 | 0.222   |
| DHBA      | <0.0001 | 0       | 0.000   | <0.0001 | <0.0001 | 0.000   | <0.0001 | <0.0001 | <0.0001 | <0.0001 | <0.0001 | 0.001   | <0.0001 | 0.002   | 0.013 | 0.004   |
| SalA      | 0.095   | 0.000   | 0       | 0.003   | 0.063   | 0.029   | 0.062   | 0.030   | 0.063   | 0.055   | <0.0001 | <0.0001 | <0.0001 | <0.0001 | 0.061 | <0.0001 |
| ToHBen    | <0.0001 | <0.0001 | 0.003   | 0       | <0.0001 | <0.0001 | <0.0001 | <0.0001 | <0.0001 | <0.0001 | <0.0001 | 0.002   | <0.0001 | 0.009   | 0.019 | 0.012   |
| DHBA2     | <0.0001 | <0.0001 | 0.063   | <0.0001 | 0       | <0.0001 | <0.0001 | <0.0001 | <0.0001 | <0.0001 | 0.001   | 0.019   | 0.001   | 0.073   | 0.129 | 0.085   |
| MEA       | <0.0001 | 0.000   | 0.029   | <0.0001 | <0.0001 | 0       | <0.0001 | <0.0001 | <0.0001 | <0.0001 | 0.004   | 0.064   | 0.004   | 0.112   | 0.115 | 0.138   |
| ToPA's    | <0.0001 | <0.0001 | 0.062   | <0.0001 | <0.0001 | <0.0001 | 0       | <0.0001 | <0.0001 | <0.0001 | 0.001   | 0.019   | 0.001   | 0.074   | 0.129 | 0.086   |
| CA        | <0.0001 | <0.0001 | 0.030   | <0.0001 | <0.0001 | <0.0001 | <0.0001 | 0       | <0.0001 | <0.0001 | 0.000   | 0.009   | 0.000   | 0.045   | 0.092 | 0.053   |
| MCA       | <0.0001 | <0.0001 | 0.063   | <0.0001 | <0.0001 | <0.0001 | <0.0001 | <0.0001 | 0       | <0.0001 | 0.001   | 0.019   | 0.001   | 0.073   | 0.129 | 0.085   |
| ToCA      | <0.0001 | <0.0001 | 0.055   | <0.0001 | <0.0001 | <0.0001 | <0.0001 | <0.0001 | <0.0001 | 0       | 0.001   | 0.016   | 0.001   | 0.067   | 0.121 | 0.078   |
| HAA       | 0.004   | <0.0001 | <0.0001 | <0.0001 | 0.001   | 0.004   | 0.001   | 0.000   | 0.001   | 0.001   | 0       | <0.0001 | <0.0001 | <0.0001 | 0.050 | <0.0001 |
| LAA       | 0.057   | 0.001   | <0.0001 | 0.002   | 0.019   | 0.064   | 0.019   | 0.009   | 0.019   | 0.016   | <0.0001 | 0       | <0.0001 | <0.0001 | 0.167 | <0.0001 |
| TAA       | 0.004   | <0.0001 | <0.0001 | <0.0001 | 0.001   | 0.004   | 0.001   | 0.000   | 0.001   | 0.001   | <0.0001 | <0.0001 | 0       | <0.0001 | 0.055 | <0.0001 |
| HPC       | 0.182   | 0.002   | <0.0001 | 0.009   | 0.073   | 0.112   | 0.074   | 0.045   | 0.073   | 0.067   | <0.0001 | <0.0001 | <0.0001 | 0       | 0.301 | <0.0001 |
| LPC       | 0.048   | 0.013   | 0.061   | 0.019   | 0.129   | 0.115   | 0.129   | 0.092   | 0.129   | 0.121   | 0.050   | 0.167   | 0.055   | 0.301   | 0     | 0.498   |
| TPC       | 0.222   | 0.004   | <0.0001 | 0.012   | 0.085   | 0.138   | 0.086   | 0.053   | 0.085   | 0.078   | <0.0001 | <0.0001 | <0.0001 | <0.0001 | 0.498 | 0       |

**Table S3.B. Coefficients of determination (Pearson)**

| Variables     | DHTA     | DHBA1    | SalA     | ToHBen   | DHBA2    | MEA      | ToPA's   | CA       | MCA      | ToCA     | HAA      | LAA      | TAA      | HPC      | LPC      | TPC      |
|---------------|----------|----------|----------|----------|----------|----------|----------|----------|----------|----------|----------|----------|----------|----------|----------|----------|
| <b>DHTA</b>   | <b>1</b> | 0.609    | 0.140    | 0.776    | 0.851    | 0.652    | 0.853    | 0.896    | 0.850    | 0.867    | 0.365    | 0.178    | 0.357    | 0.092    | 0.191    | 0.077    |
| <b>DHBA</b>   | 0.609    | <b>1</b> | 0.491    | 0.936    | 0.647    | 0.535    | 0.647    | 0.704    | 0.648    | 0.662    | 0.797    | 0.460    | 0.783    | 0.399    | 0.282    | 0.367    |
| <b>SalA</b>   | 0.140    | 0.491    | <b>1</b> | 0.372    | 0.171    | 0.228    | 0.171    | 0.225    | 0.171    | 0.180    | 0.796    | 0.785    | 0.798    | 0.820    | 0.173    | 0.780    |
| <b>ToHBen</b> | 0.776    | 0.936    | 0.372    | <b>1</b> | 0.781    | 0.573    | 0.781    | 0.862    | 0.781    | 0.802    | 0.697    | 0.410    | 0.687    | 0.311    | 0.259    | 0.288    |
| <b>DHBA2</b>  | 0.851    | 0.647    | 0.171    | 0.781    | <b>1</b> | 0.739    | 1.000    | 0.940    | 1.000    | 0.998    | 0.447    | 0.258    | 0.442    | 0.159    | 0.117    | 0.148    |
| <b>MEA</b>    | 0.652    | 0.535    | 0.228    | 0.573    | 0.739    | <b>1</b> | 0.740    | 0.717    | 0.739    | 0.741    | 0.364    | 0.169    | 0.358    | 0.128    | 0.125    | 0.112    |
| <b>ToPA's</b> | 0.853    | 0.647    | 0.171    | 0.781    | 1.000    | 0.740    | <b>1</b> | 0.941    | 1.000    | 0.998    | 0.446    | 0.258    | 0.442    | 0.159    | 0.117    | 0.147    |
| <b>CA</b>     | 0.896    | 0.704    | 0.225    | 0.862    | 0.940    | 0.717    | 0.941    | <b>1</b> | 0.940    | 0.959    | 0.495    | 0.305    | 0.492    | 0.195    | 0.142    | 0.184    |
| <b>MCA</b>    | 0.850    | 0.648    | 0.171    | 0.781    | 1.000    | 0.739    | 1.000    | 0.940    | <b>1</b> | 0.998    | 0.447    | 0.258    | 0.443    | 0.159    | 0.117    | 0.148    |
| <b>ToCA</b>   | 0.867    | 0.662    | 0.180    | 0.802    | 0.998    | 0.741    | 0.998    | 0.959    | 0.998    | <b>1</b> | 0.458    | 0.267    | 0.454    | 0.166    | 0.122    | 0.154    |
| <b>HAA</b>    | 0.365    | 0.797    | 0.796    | 0.697    | 0.447    | 0.364    | 0.446    | 0.495    | 0.447    | 0.458    | <b>1</b> | 0.847    | 0.999    | 0.813    | 0.188    | 0.783    |
| <b>LAA</b>    | 0.178    | 0.460    | 0.785    | 0.410    | 0.258    | 0.169    | 0.258    | 0.305    | 0.258    | 0.267    | 0.847    | <b>1</b> | 0.862    | 0.952    | 0.098    | 0.936    |
| <b>TAA</b>    | 0.357    | 0.783    | 0.798    | 0.687    | 0.442    | 0.358    | 0.442    | 0.492    | 0.443    | 0.454    | 0.999    | 0.862    | <b>1</b> | 0.827    | 0.180    | 0.798    |
| <b>HPC</b>    | 0.092    | 0.399    | 0.820    | 0.311    | 0.159    | 0.128    | 0.159    | 0.195    | 0.159    | 0.166    | 0.813    | 0.952    | 0.827    | <b>1</b> | 0.056    | 0.989    |
| <b>LPC</b>    | 0.191    | 0.282    | 0.173    | 0.259    | 0.117    | 0.125    | 0.117    | 0.142    | 0.117    | 0.122    | 0.188    | 0.098    | 0.180    | 0.056    | <b>1</b> | 0.024    |
| <b>TPC</b>    | 0.077    | 0.367    | 0.780    | 0.288    | 0.148    | 0.112    | 0.147    | 0.184    | 0.148    | 0.154    | 0.783    | 0.936    | 0.798    | 0.989    | 0.024    | <b>1</b> |
